# Supplementary material for: A comparison of lodgepole and spruce needle chemistry impacts on terrestrial biogeochemical processes during isolated decomposition
Source: PeerJ journal article supplement (doi:10.7717/peerj.9538), 2020-07-16

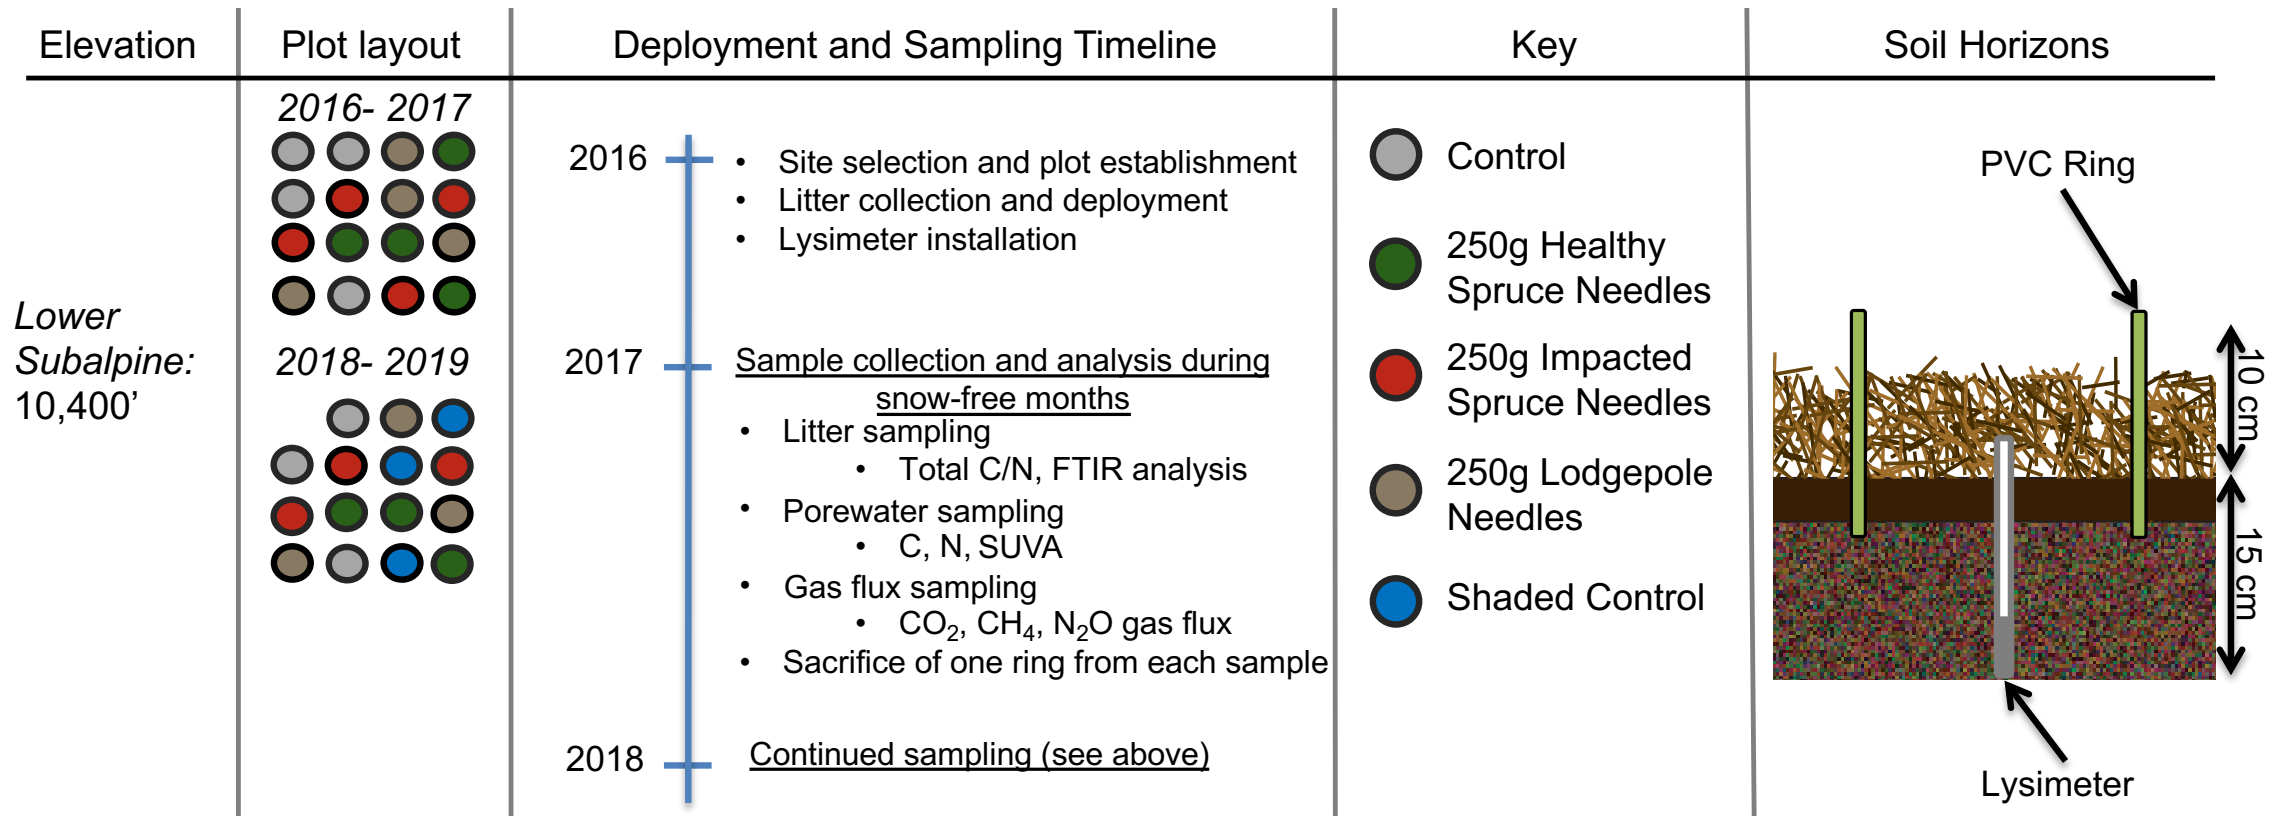

Supplement: FigureS1.pdf [file FigureS1.pdf]
