# Supplementary material for: A comparison of lodgepole and spruce needle chemistry impacts on terrestrial biogeochemical processes during isolated decomposition
Source: PeerJ. 2020 Jul 16;8:e9538. doi: 10.7717/peerj.9538 (PMC7369028; doi:10.7717/peerj.9538)
Supplement: Supplemental Information 15 [file peerj-08-9538-s015.csv]

Date	Sample	DOC	TN	UV 254	SUVA (L/mg-M)
6_15_17	RedSpruce	4.6960	0.2769	0.0930	1.980
6_15_17	RedSpruce	3.5030	0.2877	0.1101	3.143
6_15_17	RedSpruce	5.6450	0.4948	0.1753	3.105
6_15_17	RedSpruce	6.9930	0.7453	0.1525	2.181
6_15_17	RedSpruce	6.6540	0.6482	0.0827	1.243
6_15_17	RedSpruce	4.3180	0.4727	0.0783	1.813
6_15_17	Control	4.9900	0.3837	0.1863	3.733
6_15_17	Control	2.9090	0.1846	0.0528	1.815
6_14_17	Control	3.8180	0.3627	0.0394	1.032
6_14_17	Control	3.9220	0.7077	0.0521	1.328
6_15_17	Control	2.9770	0.4312	0.0660	2.217
6_14_17	Control	7.4250	0.6520	0.2368	3.189
6_15_17	Control	8.1510	0.7627	0.3177	3.898
6_14_17	Lodgepole	3.1170	0.2039	0.0616	1.976
6_14_17	Lodgepole	5.4360	0.3020	0.1740	3.201
6_14_17	Lodgepole	3.2440	0.3556	0.0861	2.654
6_15_17	Lodgepole	4.0620	0.3405	0.0267	0.657
6_15_17	Lodgepole	5.6140	0.4545	0.1378	2.455
6_15_17	Lodgepole	4.0320	0.6095	0.0618	1.533
6_14_17	GreenSpruce	6.2270	0.4558	0.2314	3.716
6_14_17	GreenSpruce	5.0070	0.2987	0.1136	2.269
6_15_17	GreenSpruce	7.4870	0.8253	-	-
6_15_17	GreenSpruce	6.2770	0.4928	0.0866	1.380
6_15_17	GreenSpruce	12.5900	0.9386	0.2995	2.379
10_13_17	RedSpruce	9.34	0.516	0.2287	2.449
10_13_17	RedSpruce	4.90	0.303	0.0417	0.851
10_13_17	RedSpruce	5.93	0.308	0.1337	2.254
10_13_17	Lodgepole	7.97	0.319	0.1041	1.306
10_13_17	Lodgepole	16.28	0.885	0.3298	2.026
10_13_17	Lodgepole	12.63	0.694	0.172	1.362
10_13_17	Lodgepole	12.72	0.605	0.306888889	2.412
10_13_17	Control	13.74	0.706	0.3372	2.454
10_13_17	Control	11.80	0.689	0.148428571	1.258
10_13_17	Control	9.82	0.639	0.177807692	1.810
10_13_17	GreenSpruce	7.89	0.510	0.081642857	1.035
10_13_17	GreenSpruce	17.50	0.776	0.52525	3.001
10_13_17	GreenSpruce	19.42	1.081	0.438428571	2.258
5_26_18	Lodgepole	6.563	0.000	0.295	4.498
5_26_18	Lodgepole	8.754	0.571	0.247	2.826
5_26_18	Lodgepole	12.860	0.604	0.421	3.272
5_27_18	Lodgepole	14.510	0.000	0.483	3.325
5_27_18	Lodgepole	8.836	0.450	0.390	4.416
5_26_18	GreenSpruce	9.626	0.000	0.338	3.506
5_26_18	GreenSpruce	6.363	0.000	0.160	2.513
5_26_18	GreenSpruce	13.456	0.000	0.342	2.542
5_27_18	GreenSpruce	5.881	0.000	0.157	2.673
5_27_18	GreenSpruce	8.406	0.000	0.308	3.665
5_27_18	GreenSpruce	12.567	0.000	1.719	13.676
5_26_18	RedSpruce	10.001	0.000	0.338	3.383
5_26_18	RedSpruce	5.587	0.000	0.198	3.537
5_26_18	RedSpruce	6.833	0.000	0.120	1.758
5_27_18	RedSpruce	4.209	0.000	0.113	2.675
5_27_18	RedSpruce	6.467	0.000	0.244	3.767
5_27_18	Control	3.877	0.000	0.122	3.139
5_27_18	Control	5.732	0.000	0.221	3.852
5_27_18	Control	8.655	0.000	0.395	4.563
5_26_18	Control	5.596	0.000	-	-
5_26_18	Control	5.814	0.000	0.191	3.285
5_26_18	Control	8.229	0.000	0.350	4.248
10_26_18	GreenSpruce	16.515	1.204	0.391	2.366
10_26_18	GreenSpruce	14.960	0.920	0.443	2.959
10_26_18	GreenSpruce	10.764	0.631	0.187	1.733
10_26_18	Lodgepole	14.140	0.682	0.749	5.299
10_26_18	Lodgepole	12.688	0.721	-	-
10_26_18	Lodgepole	23.500	0.873	0.771	3.281
10_26_18	RedSpruce	8.672	0.539	-	-
10_26_18	RedSpruce	10.050	0.610	0.214	2.131
10_26_18	Control	12.990	0.958	-	-
